# Supplementary material for: Identification and Characterization of C-Mos in Pearl Mussel Hyriopsis cumingii and Its Role in Gonadal Development
Source: MDPI journal article supplement (doi:10.3390/biom13060931), 2023-06-01
Supplement: s1 [file s1]

# Identification and Characterization of C-Mos in Pearl Mussel *Hyriopsis cumingii* and Its Role in Gonadal Development

**Supplementary Table S1.** List of amino acid sequences used for multiple alignment analysis and NJ phylogenetic tree of C-Mos protein in *H. cumingii*.

| Accession Numbers | Species                 | Amino acid sequences                                                                                                                                                                                                                                                                                                                                                                                                                                              |
|-------------------|-------------------------|-------------------------------------------------------------------------------------------------------------------------------------------------------------------------------------------------------------------------------------------------------------------------------------------------------------------------------------------------------------------------------------------------------------------------------------------------------------------|
| XP_052244251.1    | Dreissena polymorpha    | MLERQSSRGNLHRQSTLRNINKHSCLQRQKSRHTLQRQHNSN<br>VVLQAKISDVNNNNINVNSVLSVTHVSPRVRHLLLKHTKFGFI<br>DRFQNLSLAGSSADIKSTESLPSILTESDTLIRDCQMPESLFRD<br>DFTASKTINKDDFELGRVLGAGGFGSVYLGFQKQKVAIKV<br>MHKYTKNPAAQIESFKAELHVMRFNHPNIVRTLAATHIDKF<br>DEGAWIIMEYVGFSNLYKLLSDSEEVIANERRLKFAIQIASAL<br>AYAHKHKVAHLDLKPANILITDDDNCVKVGDGFCSSQKVEID<br>TGVVSPTNRSILTGTFAYRAPELLRGEPPTFKADVYSFGITLW<br>QLKSRETPFCNQNHVVFVAVVANGMRPPDMSPAETDPFEL<br>SYKDLYAQCWATANPLDRPSASEVVDVLNIWKLHL |
| XP_021343629.1    | Mizuhopecten yessoensis | MVMVKVREETHSFNHGHQHTPVHGHHRHVHHHHGHNSPV<br>HTLKSLSFGKYRHLRCSSPKLCLSTPKSKRLSESKRNCLGGEIR<br>RPFLINKKGGEDNDSVFIKEDFKLGKLLGAGGFGSVYMANG<br>KSGHGSMIAIKVLKKPTMSKNPDAMFESFKAELRCMQLSHP<br>NVVQSLGATHMTSFEEGAWVVMYVVGERTLQAVLNESEQV<br>DITIELRLKFAIQIAQGLKYLHDNSIVHLDIKPANILITPDGDC<br>KIGDLGCSQILEEGTGRVSPTQRSSLTGTFAYRAPELLRGDAP<br>TRKADIYSFGITMWQMLARDNPNYGNENQHVVIFGVVAYGH<br>RPKHPNMSEQNPFELCYRDLYSQCWSTPQNRPSADELVEV<br>LDIWKNQL                                 |
| XP_050403259.1    | Patella vulgata         | MPADVKNKVSEILMVSESCFVLDDFEVLPQTPFEDLASRFLNK<br>DDYDLGKLLGAGGFGSVYLASYKNKITAVKTLHKVTKNPK<br>AQMESYKAELNVYNWKHPNIVRTVAATSIEQYDTGAWIVM<br>EYIGSRNLQMLINDTEEELDQQRRLKYSLEVASALEFTHSNHI<br>VHLDLKPANILLTERDSCKLGDFGCCQRVEDTGRVSPTNRS<br>ALTGTFAIRAPPELLRGGAPTLVADVYSYGVTLWQLLSRETPY<br>SNQNQHVVIFSVVSKHLRPPHPDVGDPPFELLYQELYTQCW<br>SANPETRPTSRLVELLKLWKYYM                                                                                                            |
| XP_011422084.2    | Crassostrea gigas       | MKIASYIQSHQMTKTSFTTRSWQKLKHLISKYKRSRGVIRKV<br>MPKISFANNKKLKLVSDDVKLGRLLGAGGFGSVYYGSYRQ<br>RDVAVKIMHKQSKNPEAQIESFKAELHVLDFEHPNIVKTLA<br>ATPFEEFKEGAWIVMEYAGSRTLQSMINNEELCQETRIRFAI<br>QMSDALHYIHDNHVHLDLKPANILITARGDVKMADFGCS<br>QKVELDTGLVSPTQRSLTGTFAYRAPELLKGQVPSNKADIY<br>ALGVTLWQMLARENPNYGNENQHVVIFSVVAYGHRPPHPEI<br>DLDPFEECYRDLYTQCWSATQFDRPSAKELHETLKIWKHM                                                                                                |

|                |                              |                                                                                                                                                                                                                                                                                                                                                                                                                                                      |
|----------------|------------------------------|------------------------------------------------------------------------------------------------------------------------------------------------------------------------------------------------------------------------------------------------------------------------------------------------------------------------------------------------------------------------------------------------------------------------------------------------------|
| CAC5414491.1   | <i>Mytilus coruscus</i>      | MQIKNEHNLCVVKGKKYSLSSLKGINQCQHILRKYKLFRK<br>KLGQFAKRIVMPVLAQNENQRDEFKRPHAIVCTRHRNASFR<br>KEEVVLGRLLGTGGFGSVYRGKYKDSTVAVKVMHRVTKNP<br>AAQLESFKAELNTIGFDHENIVKTITATSLETFDQGAWIVME<br>YAGRRTLQSLVDDDSVSLGPRRRVKFSQQIAEALKYAHDMDK<br>IVHLDLKPANILITPGGRCKVADFGCSQKVEIDTGIFSPTQRSI<br>LTGTFAYRAPELLKGEAPSKKADIYALAVIMWQLLSRQTPFS<br>NENQHVVIFGVVAYGQRPKHPEIEVDPFEESYRDLYSQCWL<br>PCPLDRPTAGEIAELLNIWRGYM                                                  |
| XP_033738057.1 | <i>Pecten maximus</i>        | MFRLTSVDLYMRVHKVLNLRTIKMVMVVKVREETHTFHHGH<br>HHHTPTRGHLVHHRHGHNSPAHTLKSIFGKYRHLRCSSPK<br>PNISTPKSKRLSESKRNCLSSEFRKPFLIKNGAADDSDSVFIK<br>EDFKLGKLLGAGGFGSVYMANGKSGHDSIAIKVMKKPTMS<br>KNPDMFESFKAELRCMQLAHPNIVQSLGATHMTSFEDGA<br>WVVMYAGDRTLQTALNESHVDLTIEIRVKFSTQIAQGLKYL<br>HDNNIVHLDIKPANILITPDGVCKIGDLGCSQILEEGTGKVSP<br>TQRSSLTGTFAYRAPELLRGDAPTRKADIYSYGVMTMWQMLA<br>RDNPYGNENQHVVIFGVVAYGHRPKHPNMSEQCPFELCYR<br>DLYSQCWDSVPENRPSADELVKVLDVWKKNV |
| XP_046364430.1 | <i>Haliotis rufescens</i>    | MPKVAEDADDGPTEDGTDIAMVCDVIYRQSRSLSPNNTYD<br>YTIESLSGATLSKKDVSLGRLLGSGGFGSVYLGTYKNKEVAV<br>KILHAVTKNPQAQIQSFKAELAILNFKHPHIIRTITATTLEDF<br>NDGAWVMEYVSDQTLHGVINNMDQQLCMVRRLLKYALQI<br>ASAVQYAHDNICIVHLDIKPVNILLTQDDDCKLGDGFCCE<br>VEFNTGRVSPTNRSALTGTFAYRAPELLKGGPPSLQADIYSFG<br>VTLWQMLSRETPYANENQHVVIFGVVAYGLRPHKHPVIGDEP<br>FDKLYQDLYTQCWVAGPEDRPTSTDLMELLETWKQYLD                                                                                  |
| XP_045157467.1 | <i>Mercenaria mercenaria</i> | MLERQHSIGQTSKPHTPNRNHINRHSLQRQKSRRLFQKQR<br>TSVCLFSSKPADDTLNNGEKVVS AKLRRMMLLKHTKFGFIES<br>FQNLTVKQVCDTDCRVKGESDQLVQNYMPDPNLVFDSQIS<br>AKIINKEEFELGRVLGAGGFGSVYLG SFKRQTV AIKVMHKYT<br>KNPAQLESFRAELHVMRFNHPNIVKT LAATHIDQFDDGA<br>WVVMYIGKSSLQGIINDHSEPFDSRRLKYSIQVASALAYA<br>HKNKVAHLDLKPANILITSTDDCKVGDFGCSQRVEFDTGIVS<br>PTNRSILTGTFAYPELLRGEPTFKADVSYGITMWQMK<br>RETPFTNQNHVVIFGVVANGLRPKDPEPSETDPFELSYKDL<br>YSQCWNACPLDRPSAQELVELLNIWKENL     |
| XP_031759862.1 | <i>Xenopus tropicalis</i>    | MPSPIPVERFLPRDLSPSIDLRPCSSPLELSHRKVPGSGRHRLL<br>PPRLAWCSIDWEQVRLLEPVGSGGFGSVYRAIYKGETVALKK<br>VKRCTKNLSASRQSFWAELNAARLRHPHVVRVLAASASCP<br>GDPGCPGTIIMEYAGDTLHGRIYGRCPPLGAAVCMRYARH<br>VADGLCFLHRDGVVHLDLKPANVLLAPGGLCKIGDFGCSQ<br>RLRDGD SAGGEPCTQLRHVGGTYTHRAPELLKGEPTAK<br>ADIYSFAITLWQMVSRPELPTGDRQCVLYAVVAYALRPEMG<br>PLFSCTEEGRAVRHIVQSCWAARPEERPSAEQLLERLEQESA<br>LYRGVSSSPAQYTSPLSAAHRGP                                                      |

|                |                       |                                                                                                                                                                                                                                                                                                                                                                                                                                                                                                                                                                                                                                                                                                                 |
|----------------|-----------------------|-----------------------------------------------------------------------------------------------------------------------------------------------------------------------------------------------------------------------------------------------------------------------------------------------------------------------------------------------------------------------------------------------------------------------------------------------------------------------------------------------------------------------------------------------------------------------------------------------------------------------------------------------------------------------------------------------------------------|
| NP_005363.1    | Homo sapiens          | MPSPLALRPYLRFSEFSPVDARPCSSPSELPKLLLGATLPRAP<br>RLPRRLAWCSIDWEQVCLLQRLGAGGFGSVYKATYRGVPV<br>AIKQVNKCTKNRLASRRSFWAELNVARLRHDNIVRVVAAS<br>TRTPAGSNSLGTIIMEFGGNVTLHQVIYGAAGHPEGDAGEP<br>HCRTGGQLSLGKCLKYSLDVVNGLLFLHSQSIVHLDLKPANI<br>LISEQDVCKISDFGCSEKLEDLLCFQTPSYPLGGTYTHRAPEL<br>LKGEVTPKADIYSFAITLWQMTTKQAPYSGERQHILYAVV<br>AYDLRPSLSAAVFEDSLPGQRLGDVIQRCWRPSAAQRPSARL<br>LLVDLTSLKAELG                                                                                                                                                                                                                                                                                                                        |
| NP_064405.2    | Mus musculus          | MPSPLSLCRYLPRELSPSVDSRSCSIPLVAPRKAGKFLGTTPP<br>RAPGLPRRLAWFSIDWEQVCLMHRLGSGGFGSVYKATYHG<br>VPVAIKQVNKCTKDLRASQRSFWAELNIARLRHDNIVRVVA<br>ASTRTPEDSNSLGTIIMEFGGNVTLHQVIYGATRSPEPLSCRE<br>QLSLGKCLKYSLDVVNGLLFLHSQSILHLDLKPANILISEQDV<br>CKISDFGCSQKLQDLRCRQASPHHIGGTYTHQAPEILKGEIA<br>TPKADIYSFGITLWQMTTREVYPYSGEPQYVQYAVVAYNLRPS<br>LAGAVFTASLTGKTLQNIQSCWEARALQRPGAELLQRDLK<br>AFRGALG                                                                                                                                                                                                                                                                                                                          |
| NP_991143.1    | Danio rerio           | MPSPIPVTRLLPKDFGLEFGACSSPLTKTASGSTLRVPTNKFH<br>GKVAHRLWSSVIHWRELQALEPIGSGGFGTVFRGTYFGETV<br>AVKKVKCVKNKLASRQSWAELNAAHLHHQNIVRVLAAT<br>TCTPAHLNTKDNIGTIVMEFAGNINLQKLIYGLTDLLPVEKC<br>IKYSIDIARALQHLHAHGVVHLDLKPANVLLSEQGVCKIAD<br>FGCSFKISSTSDTVTHMNEIGGTFTHRAPELLKGEEVSPRVDV<br>YSFGITLWQLLTREPPYEGDRQYILYAVVGYNLRPLTSRNVFT<br>QFFIGQNCQKLISRCWDGDPsirPTADKFVDELSVLL                                                                                                                                                                                                                                                                                                                                            |
| XP_022319224.1 | Crassostrea virginica | MKTTSYSYSHQMTKTTFTTRSWQKLKHLISKYKRSRGGFFRK<br>VMPKISLVHNKKLTHVNKEEVKLGRLLGAGGFGSVYLGSYR<br>QHDVAVKIMHKQSKNAAQMESFKAELHVLD FEHPNIVRT<br>LAATPFEEFPEGGWIVMEYAGSRTLQSMNLSEELCQETRIQF<br>ALQMSDALQYIHQNHVHLHLDLKPANILITRGDIKIADFGCS<br>QKVEVD TGLVSPTQRSLLTGTFAYRAPELLKGQVPSQKADIY<br>ALGVT LWQMLARENPYGNENQHVVIFSVVAYGQRP PHPQI<br>EMDPFEECYRDLYSQCWAVSQDRPSAKELHETLKIWK KYM                                                                                                                                                                                                                                                                                                                                       |
| CAG2253472.1   | Mytilus edulis        | MQIKSKQNLCSVVKDKKYSSSLKGLNQCQHILRKYKLFRKK<br>LGQFAKRIVMPVLAHKEKKRDEFKRPHAIVSSRHRNTSLKK<br>EEVVLGRLLGTGGFGSVYRGKYKDSTVAVKVMHRVTKNPA<br>AQLESFKAELNTIGFDHENIVKTITATSLDAFDQGAWIVMEY<br>AGHRTLQSLIDDD SISLGPCRRVKFSQQIAEALKYAHDMKIV<br>HLDLKPANILITPDGRCKVADFGCSQKVEIDTGIVSPTQRSIL<br>TGTFAYRAPELLKGAEPSKRADIYALAVIMWQLLSRQTPFSN<br>ENQHVVIFGVVAYGQRPKHPEIDVDPFEESYRDLYSQCWLP<br>CALDRPTAGEIAELLNIWRGQGFGIATYMERNTVFKQNVW<br>NFMYGKNGSSEHSDSEGEITPPIQAEKTVREVKTYSVLPPPAD<br>YTPTEPLEDNKGEDEPSDSSSSSDSKPARKRKRKNRRHTEK<br>CKEEKSHQHDTSDKKLTKNQKRKLKKRRKEKQKNEDKSV<br>TFSFISSEDNQISAETTSNNEIQDRVADLSNFFDAVWDVYKL<br>QEREKSDEQQDVFDELNKSLSLLDDHSKEIESQLNIIHNIKRLI<br>LLGDMKSAGDLMSSMKSDGCFMSEGVNHLIIRLFEYWMKDI<br>SDKG |

>XP\_046567047.1 *Haliotis rubra* MPKFEEHGADDGQTDDVADIEMVCDAIYRQSRSLSPNNTF  
DHTIESLSGETLSKKDVSLGRLLGSGGFGSVYLGTYKNNEVA  
VKIFHAVSKNPLAQVQSFAELAILNFKHPHIIRTLTATTLDD  
FNDGPWVVMYVSDQTLQSVINDMDQQLCMVRRLKHALQ  
IASAVQYAHDNCIVHLDIKPVNVLLTQDDDCKLGDFGCCQ  
EVEFNTGRVSPTNRSALTGTFAYPELLKGGAPSLQADIYS  
YGVTLWQMLSRETQYANENQHVVIFGVVAYGLRPHKHPVIG  
DEPFDKLYQDLYTQCWVAEPDDRPTSELMEILETWKQYID

---
